# Supplementary material for: Rapid visual Candidatus Liberibacter asiaticus detection (citrus greening disease) using simple alkaline heat DNA lysis followed by loop-mediated isothermal amplification coupled hydroxynaphthol blue (AL-LAMP-HNB) for potential local use
Source: PLOS journal article supplement (doi:10.1371/journal.pone.0276740), 2022-10-25
Supplement: S4 (10.1371/journal.pone.0276740.s004) [file journal.pone.0276740.s004]

**A**

| Sample<br>(0.2 g) | Extracted DNA concentration in elution<br>buffer (ng/μL) |          |          |           | Average extracted<br>DNA per g plant<br>sample weight (ng/g) |
|-------------------|----------------------------------------------------------|----------|----------|-----------|--------------------------------------------------------------|
|                   | Repeat 1                                                 | Repeat 2 | Repeat 3 | Avg.±S.D. |                                                              |
| Leaf              | 51.3                                                     | 53.0     | 53.0     | 52.4±1.0  | 20,960                                                       |
| Bud               | 55.3                                                     | 57.0     | 57.1     | 56.5±1.0  | 22,600                                                       |
| Branch            | 33.2                                                     | 34.4     | 32.2     | 33.3±1.1  | 13,320                                                       |
| Fruit             | 21.5                                                     | 20.5     | 24.1     | 22.0±1.9  | 8,800                                                        |

**B**

| Description                                                                                                                                                                          | Max<br>Score | Total<br>Score | Query<br>Cover | E<br>value | Per.<br>Ident | Accession                  |
|--------------------------------------------------------------------------------------------------------------------------------------------------------------------------------------|--------------|----------------|----------------|------------|---------------|----------------------------|
| Candidatus Liberibacter asiaticus strain AHCA1 chromosome                                                                                                                            | 562          | 1636           | 80%            | 4e-160     | 78.74%        | <a href="#">CP029348.1</a> |
| Candidatus Liberibacter asiaticus isolate HLB-M2 16S ribosomal RNA gene, partial sequence                                                                                            | 556          | 556            | 80%            | 2e-158     | 78.58%        | <a href="#">KY008940.1</a> |
| Candidatus Liberibacter asiaticus str. gxpsy, complete genome                                                                                                                        | 556          | 1648           | 80%            | 2e-158     | 78.68%        | <a href="#">CP004005.1</a> |
| Candidatus Liberibacter asiaticus haplotype H1Y 16S ribosomal RNA gene, partial sequence                                                                                             | 556          | 556            | 80%            | 2e-158     | 78.58%        | <a href="#">JQ867410.1</a> |
| Candidatus Liberibacter asiaticus isolate 37 16S ribosomal RNA gene, partial sequence                                                                                                | 556          | 556            | 80%            | 2e-158     | 78.58%        | <a href="#">JN245981.1</a> |
| Candidatus Liberibacter asiaticus isolate 371 16S ribosomal RNA gene, partial sequence                                                                                               | 556          | 556            | 80%            | 2e-158     | 78.58%        | <a href="#">GQ502291.1</a> |
| Candidatus Liberibacter asiaticus strain GuangXi-GL-10-CHN 16S ribosomal RNA gene, partial sequence                                                                                  | 556          | 556            | 80%            | 2e-158     | 78.56%        | <a href="#">EU921615.1</a> |
| Candidatus Liberibacter asiaticus 16S ribosomal RNA gene, partial sequence; 16S-23S ribosomal RNA intergenic spacer, complete sequence; and 23S ribosomal RNA gene, partial sequence | 556          | 556            | 80%            | 2e-158     | 78.56%        | <a href="#">FJ196314.1</a> |
| Candidatus Liberibacter asiaticus isolate AsMo-ii 16S ribosomal RNA gene, partial sequence                                                                                           | 553          | 553            | 80%            | 3e-157     | 78.49%        | <a href="#">KT164832.1</a> |
| Candidatus Liberibacter asiaticus strain TNal-6 16S ribosomal RNA gene, partial sequence                                                                                             | 553          | 553            | 80%            | 3e-157     | 78.49%        | <a href="#">KC800955.1</a> |
